# Supplementary material
Source: MDPI journal article supplement (https://www.mdpi.com/2673-4184/3/1/10)
Supplement: s1 [file s1]

**Table S1.** Percentage (%) of Stressful events in the previous year, CECA Q\*, and Maternal Social Support Scale (n = 61).

|                                              | Presence (%) |
|----------------------------------------------|--------------|
| <b>Stressful events in the previous year</b> | 55.7         |
| <b>Any childhood maltreatment</b>            | 59           |
| Antipathy                                    | 0            |
| Neglect                                      | 1.6          |
| Psychological/emotional abuse                | 54.1         |
| Physical abuse                               | 8.2          |
| Sexual abuse                                 | 6.6          |
| <b>Maternal Social Support Scale</b>         |              |
| Low social support                           | 6.6          |
| Medium social support                        | 88.5         |
| Adequate social support                      | 4.9          |

\* Childhood Experience of Care and Abuse Questionnaire.

**Table S2.** Percentage (%) of PAMA subscale (n = 61).

| PAMA* Subscales             | Not at all | A bit | Moderately | A lot |
|-----------------------------|------------|-------|------------|-------|
| Anxiety                     | 13.1       | 41.0  | 39.3       | 6.6   |
| Depression                  | 57.4       | 32.8  | 9.8        | 0.0   |
| Perceived Stress            | 32.8       | 32.8  | 32.8       | 1.6   |
| Irritability/Anger          | 45.9       | 34.4  | 14.8       | 4.9   |
| Relationship problems       | 60.7       | 24.6  | 13.1       | 1.6   |
| Psychosomatic problems      | 24.6       | 44.3  | 27.9       | 3.3   |
| Physiological problems      | 23.0       | 37.7  | 36.1       | 3.3   |
| Addiction/At risk behaviors | 86.9       | 11.5  | 1.6        | 0.0   |

\* Perinatal Assessment of Maternal Affectivity (PAMA).
